# Supplementary material for: Household Transmission of SARS-CoV-2: A Prospective Longitudinal Study Showing Higher Viral Load and Increased Transmissibility of the Alpha Variant Compared to Previous Strains
Source: MDPI journal article supplement (doi:10.3390/microorganisms9112371), 2021-11-17
Supplement: s1 [file s1]

**Supplementary Table S3:** Comparison of clinical severity and symptoms according to genetic variant among primary cases only (N=58).

| Clinical symptom     | Alpha               | Non-VOC viruses     | p-value<br>(chi <sup>2</sup> ) |
|----------------------|---------------------|---------------------|--------------------------------|
|                      | n (% <sup>a</sup> ) | n (% <sup>a</sup> ) |                                |
|                      | (N=18)              | (N=40)              |                                |
| Severity             |                     |                     |                                |
| Asymptomatic         | 2 (11.1)            | 3 (7.5)             |                                |
| Mild                 | 5 (27.8)            | 15 (37.5)           |                                |
| Moderate             | 11 (61.1)           | 22 (55.0)           | 0.74                           |
| Cough                | 16 (88.9)           | 30 (75.0)           | 0.23                           |
| Fever                | <b>15 (83.3)</b>    | <b>18 (45.0)</b>    | <b>0.01</b>                    |
| Dyspnea              | 10 (55.6)           | 21 (52.5)           | 0.83                           |
| Loss of taste/ smell | <b>16 (88.9)</b>    | <b>23 (57.5)</b>    | <b>0.02</b>                    |

Abbreviations: non-VOC; non variant of concern

<sup>a</sup> proportion of cases (%)
