# Supplementary material for: Household Transmission of SARS-CoV-2: A Prospective Longitudinal Study Showing Higher Viral Load and Increased Transmissibility of the Alpha Variant Compared to Previous Strains
Source: MDPI journal article supplement (doi:10.3390/microorganisms9112371), 2021-11-17
Supplement: s1 [file s1]

**Supplementary Table S4:** Association between ddPCR log<sub>10</sub> viral load (exposure) and symptoms (outcome).

| For all participants <sup>a</sup> | Crude OR (95% CI)       | p-value      | Adjusted <sup>b</sup> OR (95% CI) | p-value     |
|-----------------------------------|-------------------------|--------------|-----------------------------------|-------------|
| <b>Symptom</b>                    |                         |              |                                   |             |
| Loss of smell/taste               | <b>1.39 (1.06-1.82)</b> | <b>0.02</b>  | <b>1.40 (1.06-1.85)</b>           | <b>0.02</b> |
| Cough                             | <b>1.46 (1.01-2.11)</b> | <b>0.045</b> | 1.37 (0.93-2.01)                  | 0.11        |
| Dyspnea                           | <b>1.36 (1.00-1.86)</b> | <b>0.048</b> | 1.34 (0.96-1.86)                  | 0.08        |
| Fever                             | 1.05 (0.82-1.35)        | 0.69         | 1.04 (0.8-1.34)                   | 0.79        |
| For primary cases <sup>c</sup>    | Crude OR (95% CI)       | p-value      | Adjusted <sup>b</sup> OR (95% CI) | p-value     |
| <b>Symptom</b>                    |                         |              |                                   |             |
| Loss of smell/taste               | 1.43 (0.89-2.28)        | 0.14         | 1.39 (0.85-2.28)                  | 0.19        |
| Cough                             | 1.15 (0.69-1.9)         | 0.59         | 1.13 (0.68-1.89)                  | 0.64        |
| Dyspnea                           | 1.05 (0.71-1.56)        | 0.80         | 1.06 (0.71-1.58)                  | 0.78        |
| Fever                             | 1.2 (0.8-1.8)           | 0.38         | 1.2 (0.79-1.82)                   | 0.39        |

Abbreviations: OR; Odds Ratio, CI; Confidence Interval

<sup>a</sup> n=116, mixed-effect logistic regression model with a household-level random intercept

<sup>b</sup> adjusted for sex and age

<sup>c</sup> n=56, logistic regression
