# Supplementary material for: Household Transmission of SARS-CoV-2: A Prospective Longitudinal Study Showing Higher Viral Load and Increased Transmissibility of the Alpha Variant Compared to Previous Strains
Source: MDPI journal article supplement (doi:10.3390/microorganisms9112371), 2021-11-17
Supplement: s1 [file s1]

**Supplementary Table S1:** Frequency of participants with the various Pango lineages.

| <b>Pango lineage</b> | <b>WHO label<br/>for VOCs<sup>a</sup></b> | <b>Frequency</b> |
|----------------------|-------------------------------------------|------------------|
| B.1.1.7              | Alpha                                     | 46               |
| B.1.351              | Beta                                      | 2                |
| B.1                  | -                                         | 2                |
| B.1.1.1              | -                                         | 3                |
| B.1.1.141            | -                                         | 1                |
| B.1.1.151            | -                                         | 1                |
| B.1.1.153            | -                                         | 1                |
| B.1.1.162            | -                                         | 1                |
| B.1.1.277            | -                                         | 6                |
| B.1.1.333            | -                                         | 2                |
| B.1.1.39             | -                                         | 1                |
| B.1.1.64             | -                                         | 8                |
| B.1.36.21            | -                                         | 16               |
| B.1.160              | -                                         | 6                |
| B.1.177              | -                                         | 10               |
| B.1.258              | -                                         | 1                |
| B.1.367              | -                                         | 7                |
| B.1.398              | -                                         | 1                |
| K.3                  | -                                         | 7                |
| Missing              | NA                                        | 10               |

---

<sup>a</sup>VOCs; Variants Of Concern
