# Supplementary material for: Household Transmission of SARS-CoV-2: A Prospective Longitudinal Study Showing Higher Viral Load and Increased Transmissibility of the Alpha Variant Compared to Previous Strains
Source: MDPI journal article supplement (doi:10.3390/microorganisms9112371), 2021-11-17
Supplement: s1 [file s1]

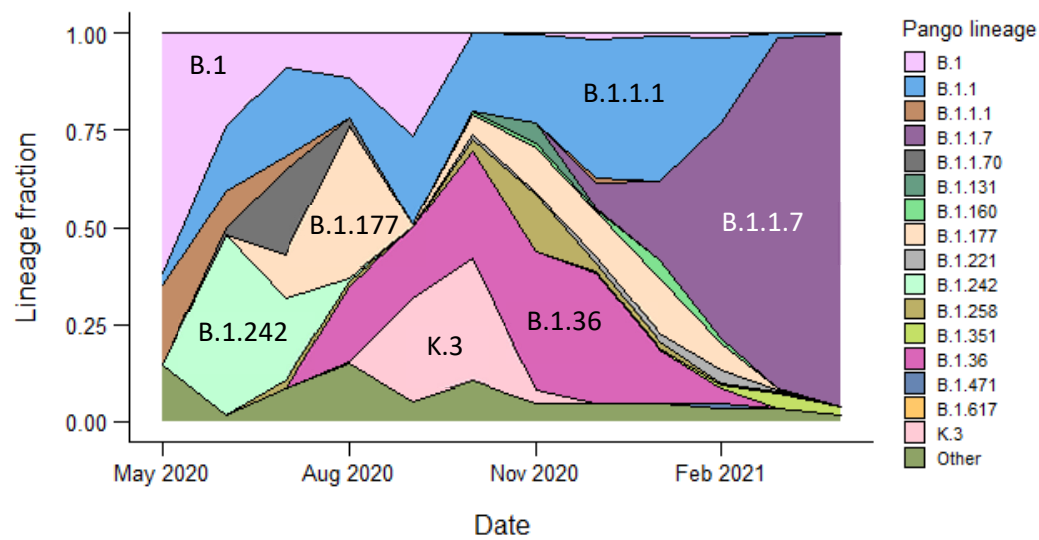

**Supplementary Figure S2:** The proportion of genetic subgroups of all SARS-CoV-2 viruses analyzed by Next Generation Sequencing (NGS) from Oslo and Viken, i.e. the counties of recruitment, per month during the study recruitment period, among sequences with >70% coverage. All subgroups with less than 5 occurrences are categorized as «Others», while «B» og «B.1» includes virus that were not allocated to a subgroup. Source: Surveillance data from the Norwegian Institute of Public Health (NIPH)
