# Supplementary material for: Household Transmission of SARS-CoV-2: A Prospective Longitudinal Study Showing Higher Viral Load and Increased Transmissibility of the Alpha Variant Compared to Previous Strains
Source: MDPI journal article supplement (doi:10.3390/microorganisms9112371), 2021-11-17
Supplement: s1 [file s1]

**Supplementary Table S2:** Comparison of clinical severity according to genetic variant (N=123) or age (N=132) amongst confirmed cases

| Clinical severity | Genetic variant (n% <sup>a</sup> ) |                        |                           | Age (n% <sup>a</sup> ) |                   |                | p-value, chi <sup>2</sup> |
|-------------------|------------------------------------|------------------------|---------------------------|------------------------|-------------------|----------------|---------------------------|
|                   | Alpha (N=46)                       | Non-VOC viruses (N=77) | p-value, chi <sup>2</sup> | 2-17 yrs (N=31)        | ≥18-39 yrs (N=52) | ≥40 yrs (N=49) |                           |
| Asymptomatic      | 10 (21.7)                          | 7 (9)                  |                           | 11 (35.5)              | 6 (11.5)          | 2 (4.1)        |                           |
| Mild              | 16 (34.8)                          | 38 (49.4)              |                           | 17 (54.8)              | 16 (30.8)         | 24 (50.0)      |                           |
| Moderate          | 20 (43.5)                          | 32 (41.6)              | 0.09                      | 3 (9.7)                | 30 (57.7)         | 23 (46.9)      | <0.00                     |

Abbreviations: non-VOC; non- Variant of Concern.

<sup>a</sup> proportion of cases (%)
